# Supplementary material
Source: Springer Nature journal article supplement (https://www.springermedizin.de/resource/supplementary/13054_2010_8817_MOESM2_ESM.pdf/9732644)

# Community- acquired

# Nosocomial

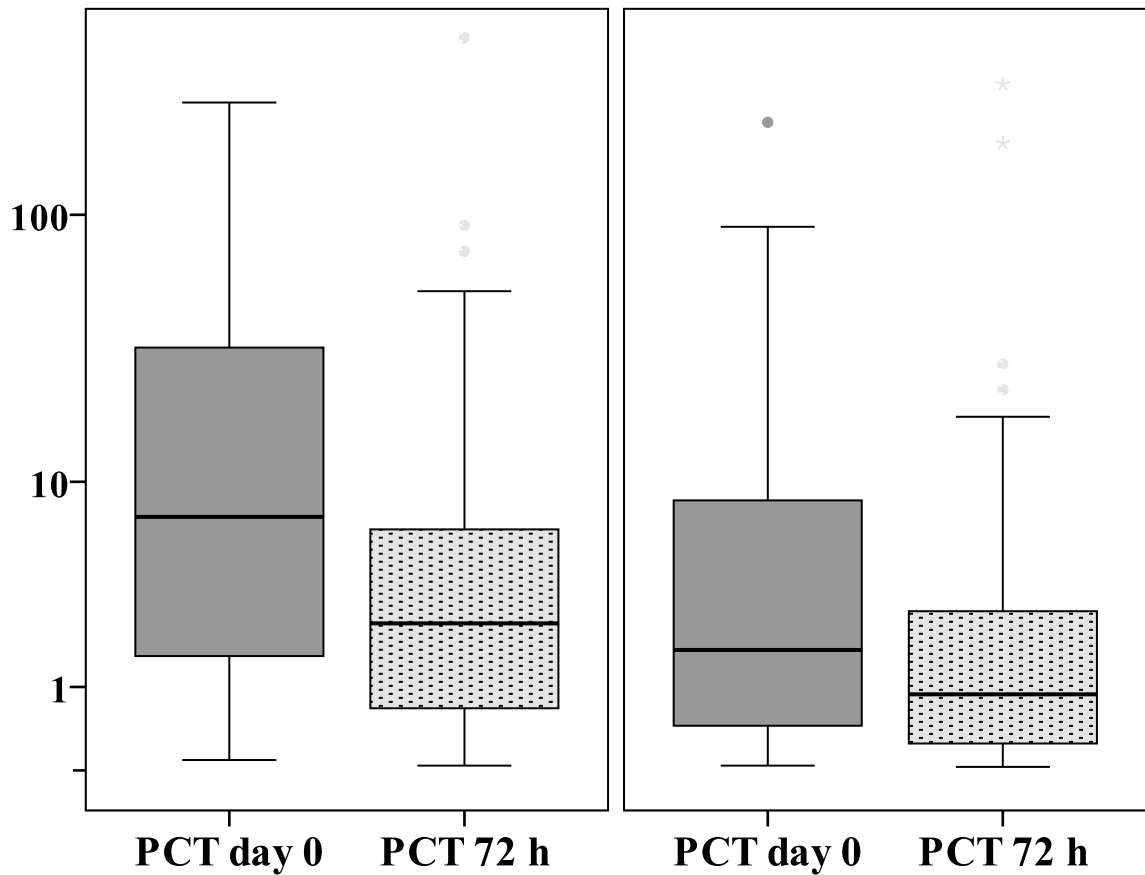

Supplement: MOESM2 [file 9732644]
